# Supplementary material
Source: PubMed Central journal article supplement (PMC5891352)

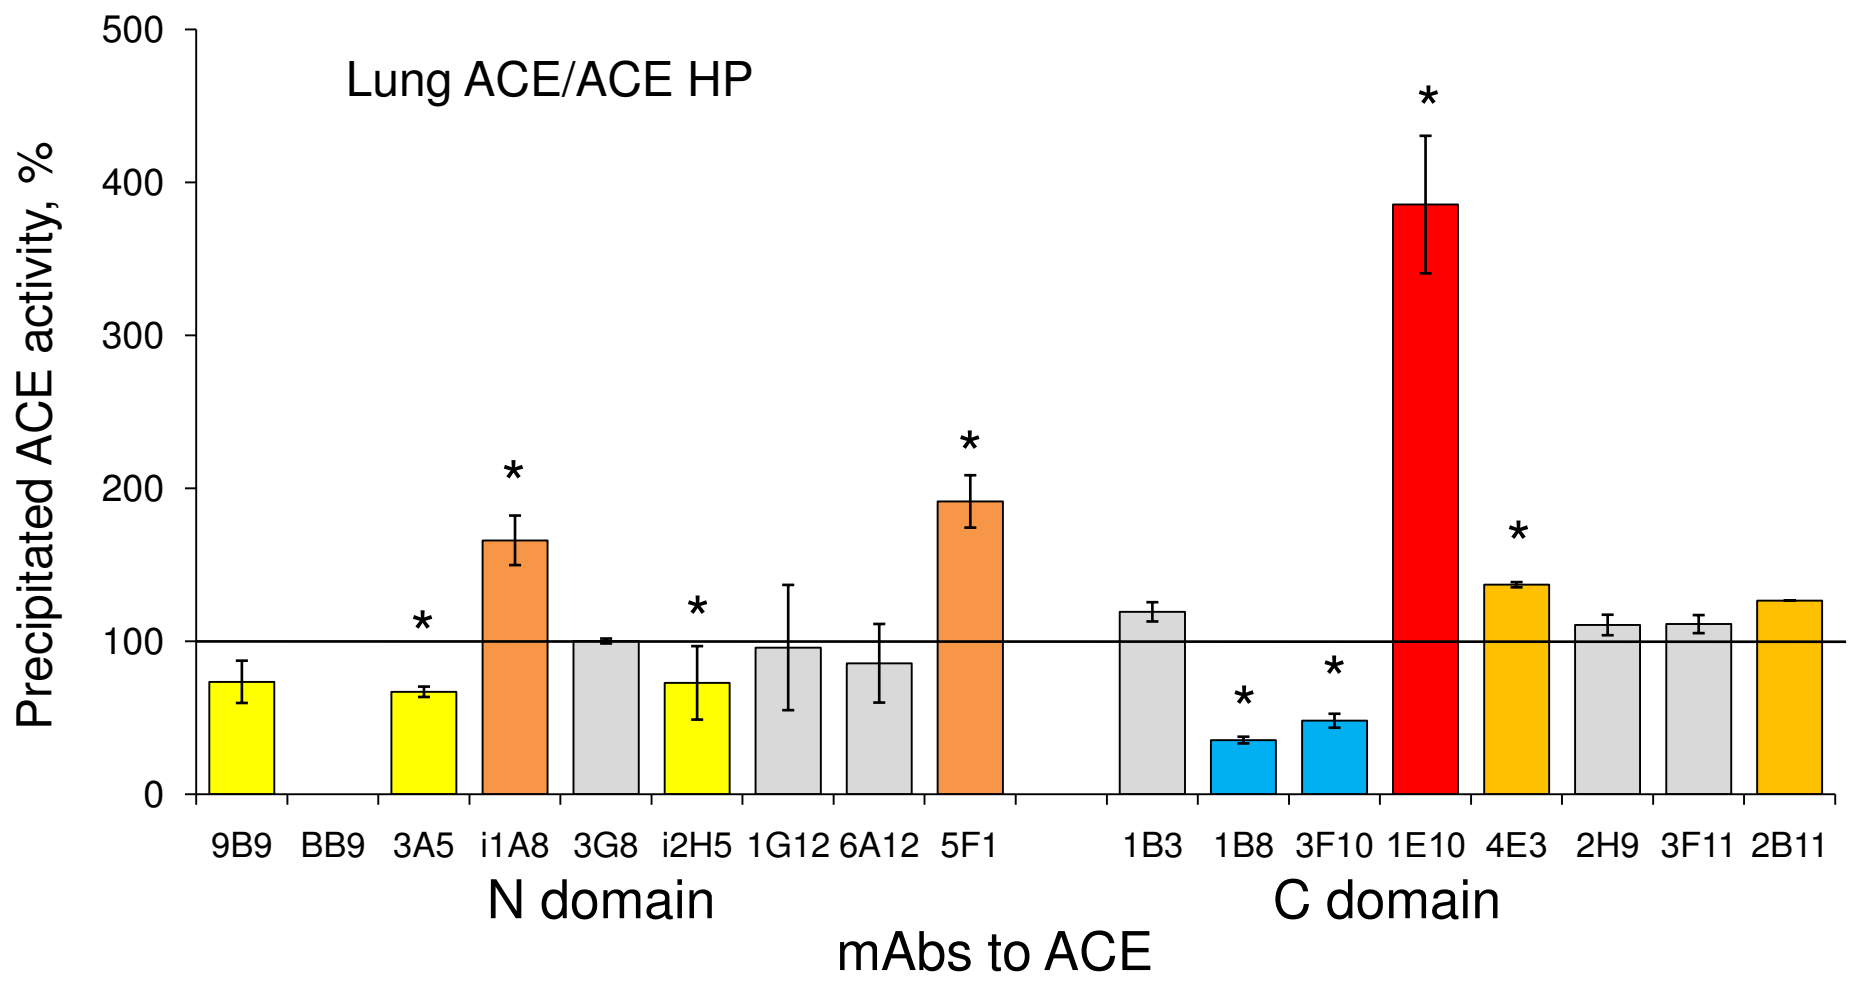

Fig.S1

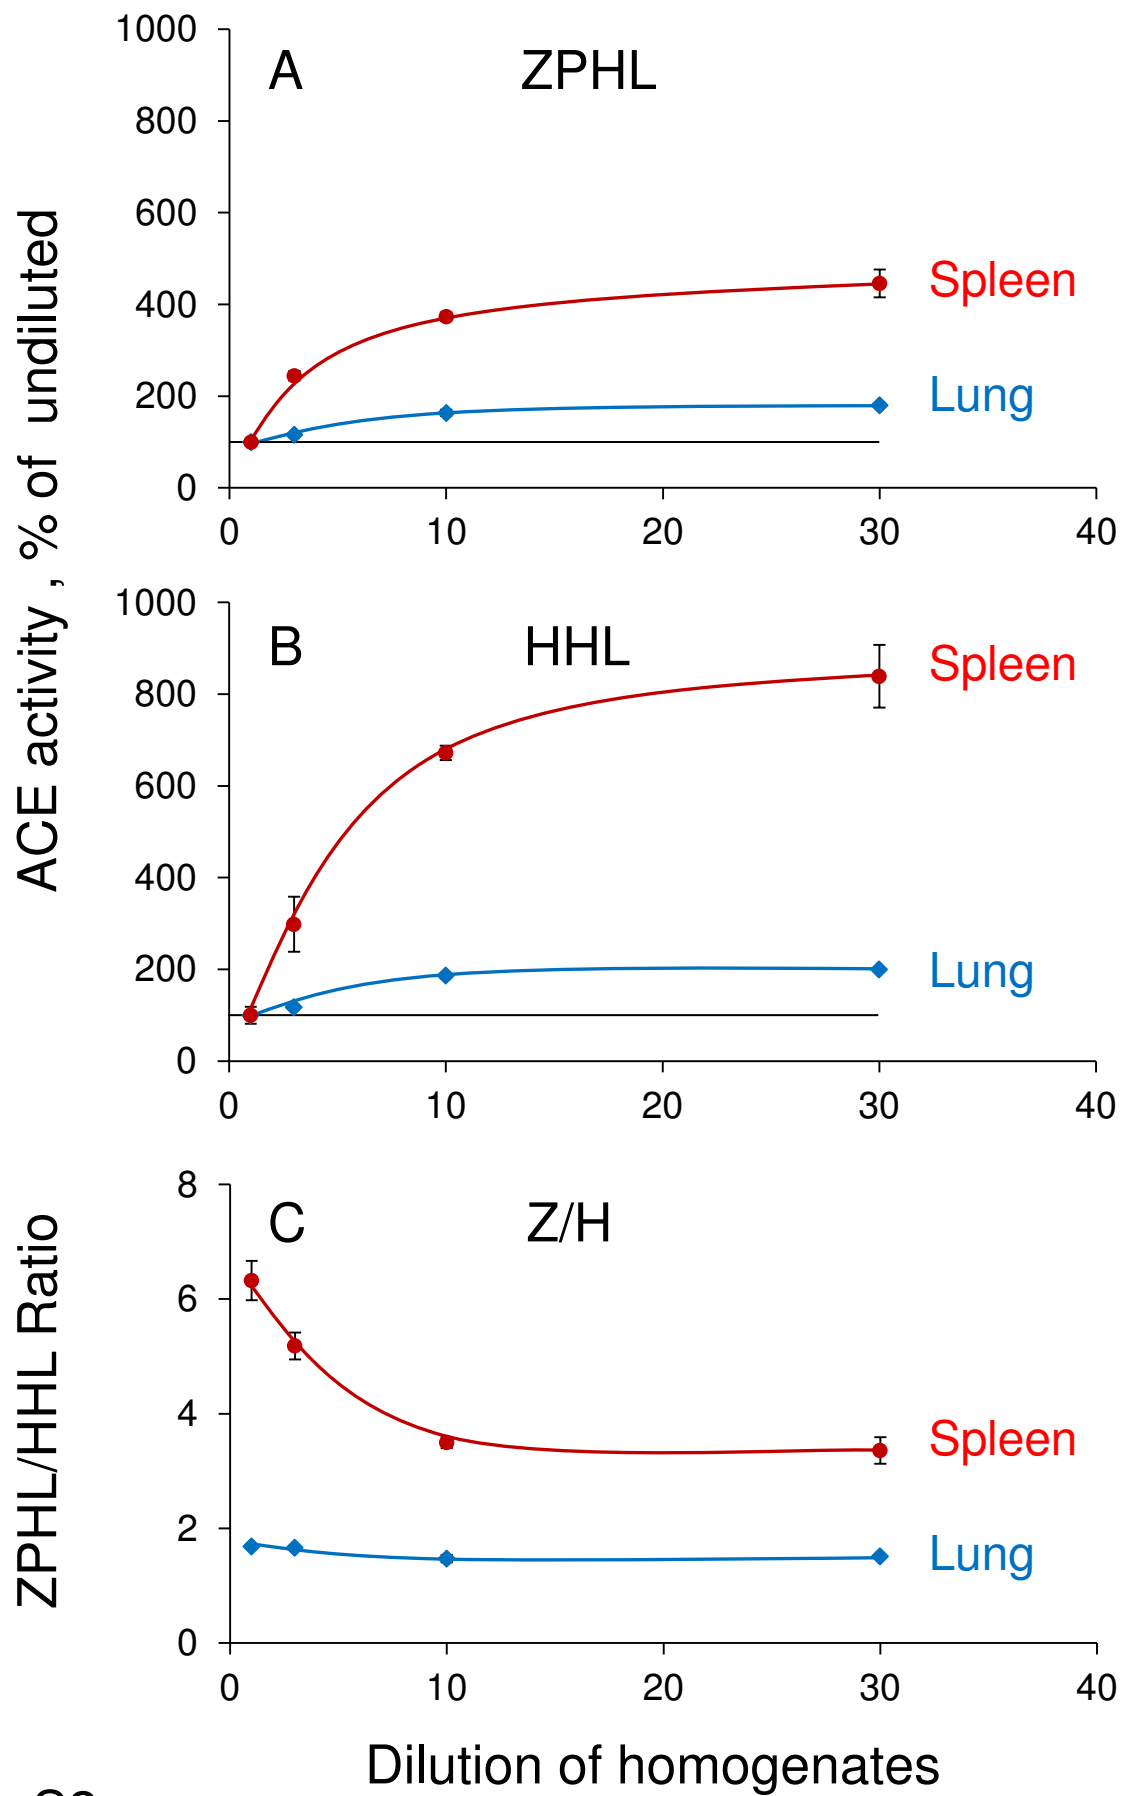

Fig. S2

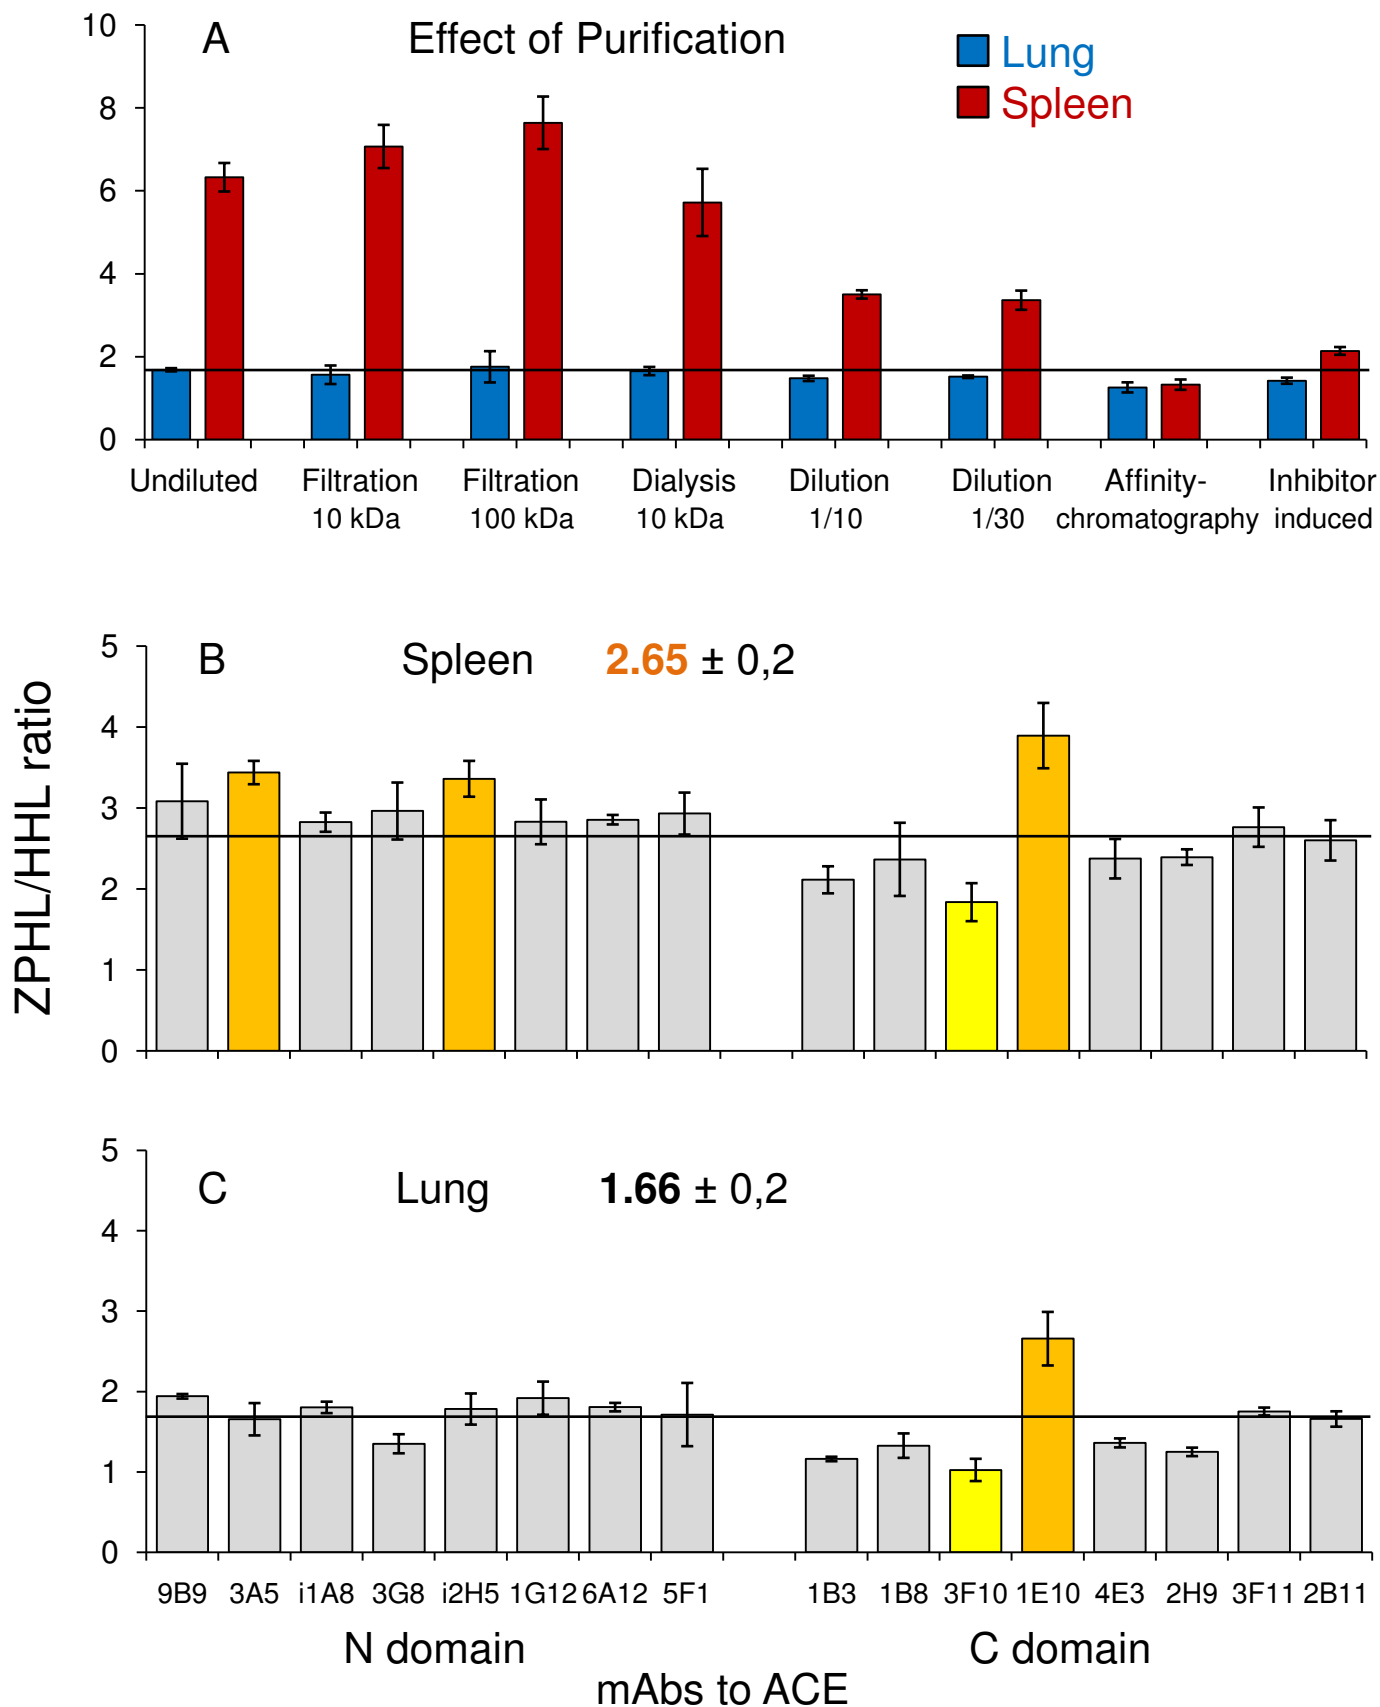

Fig. S3

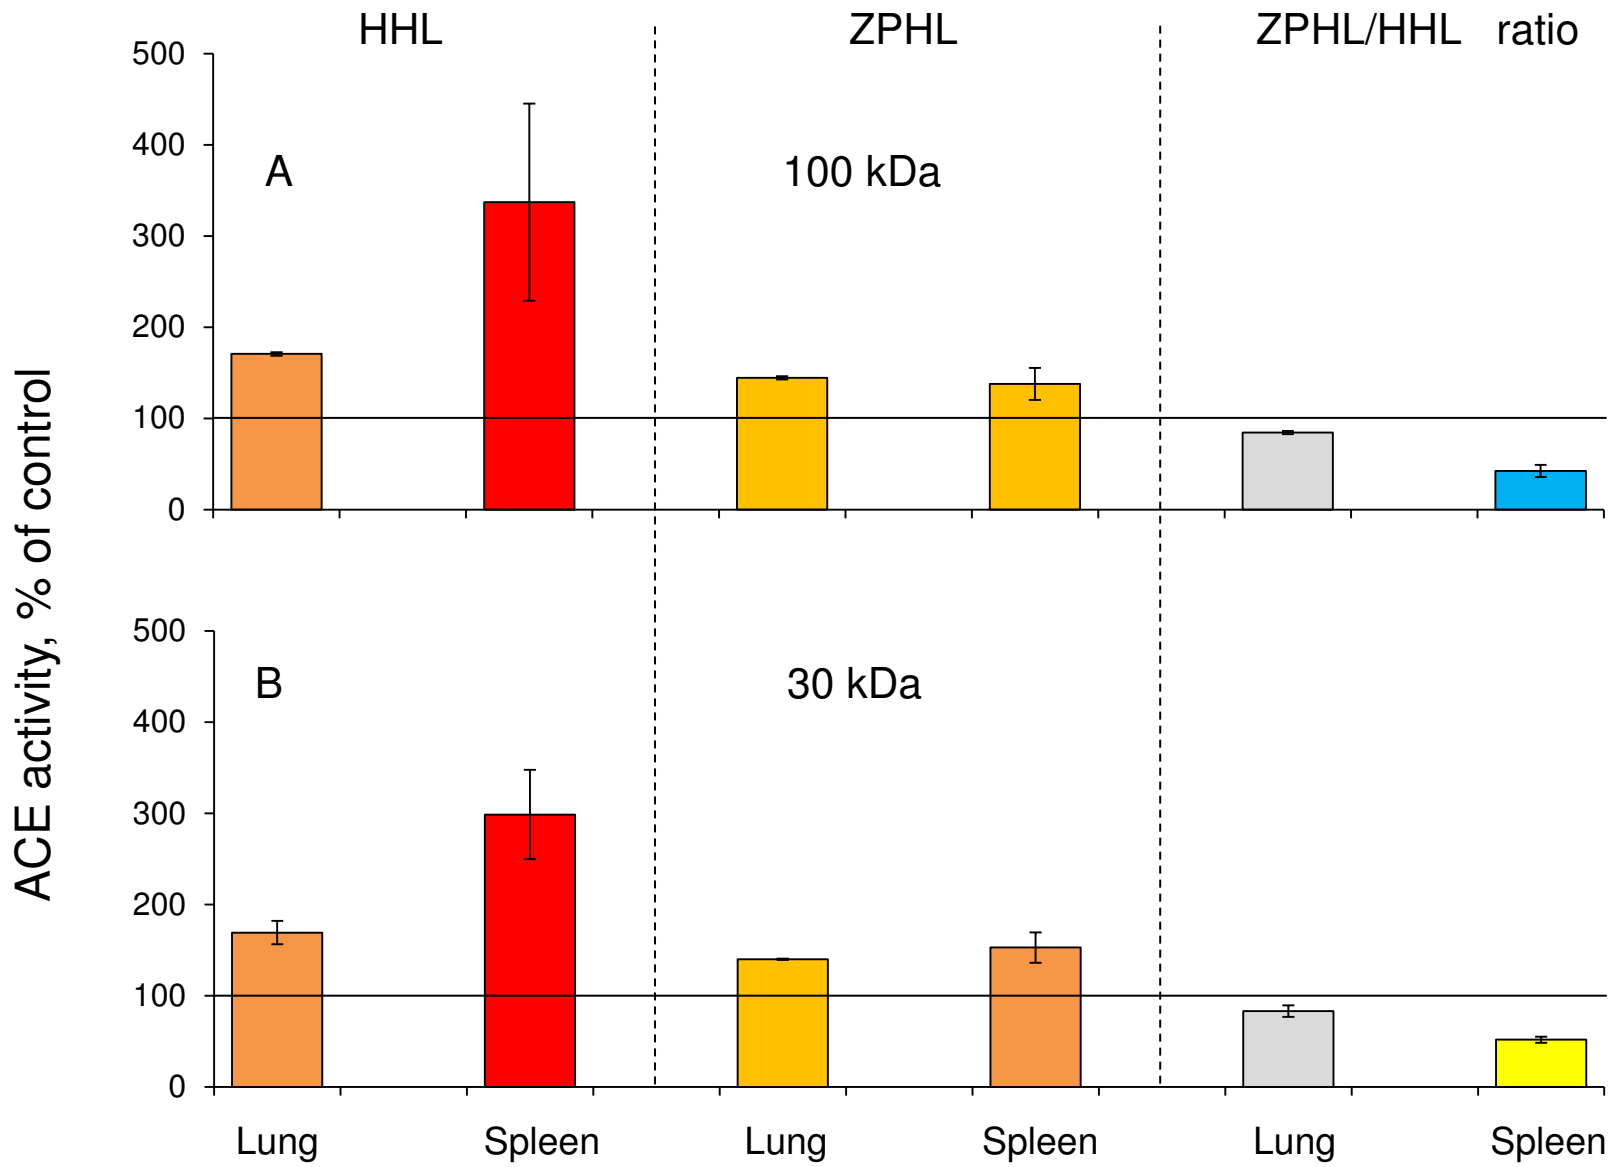

Fig. S4

# Effect of 10-30 kDa filtrates on ACE activity

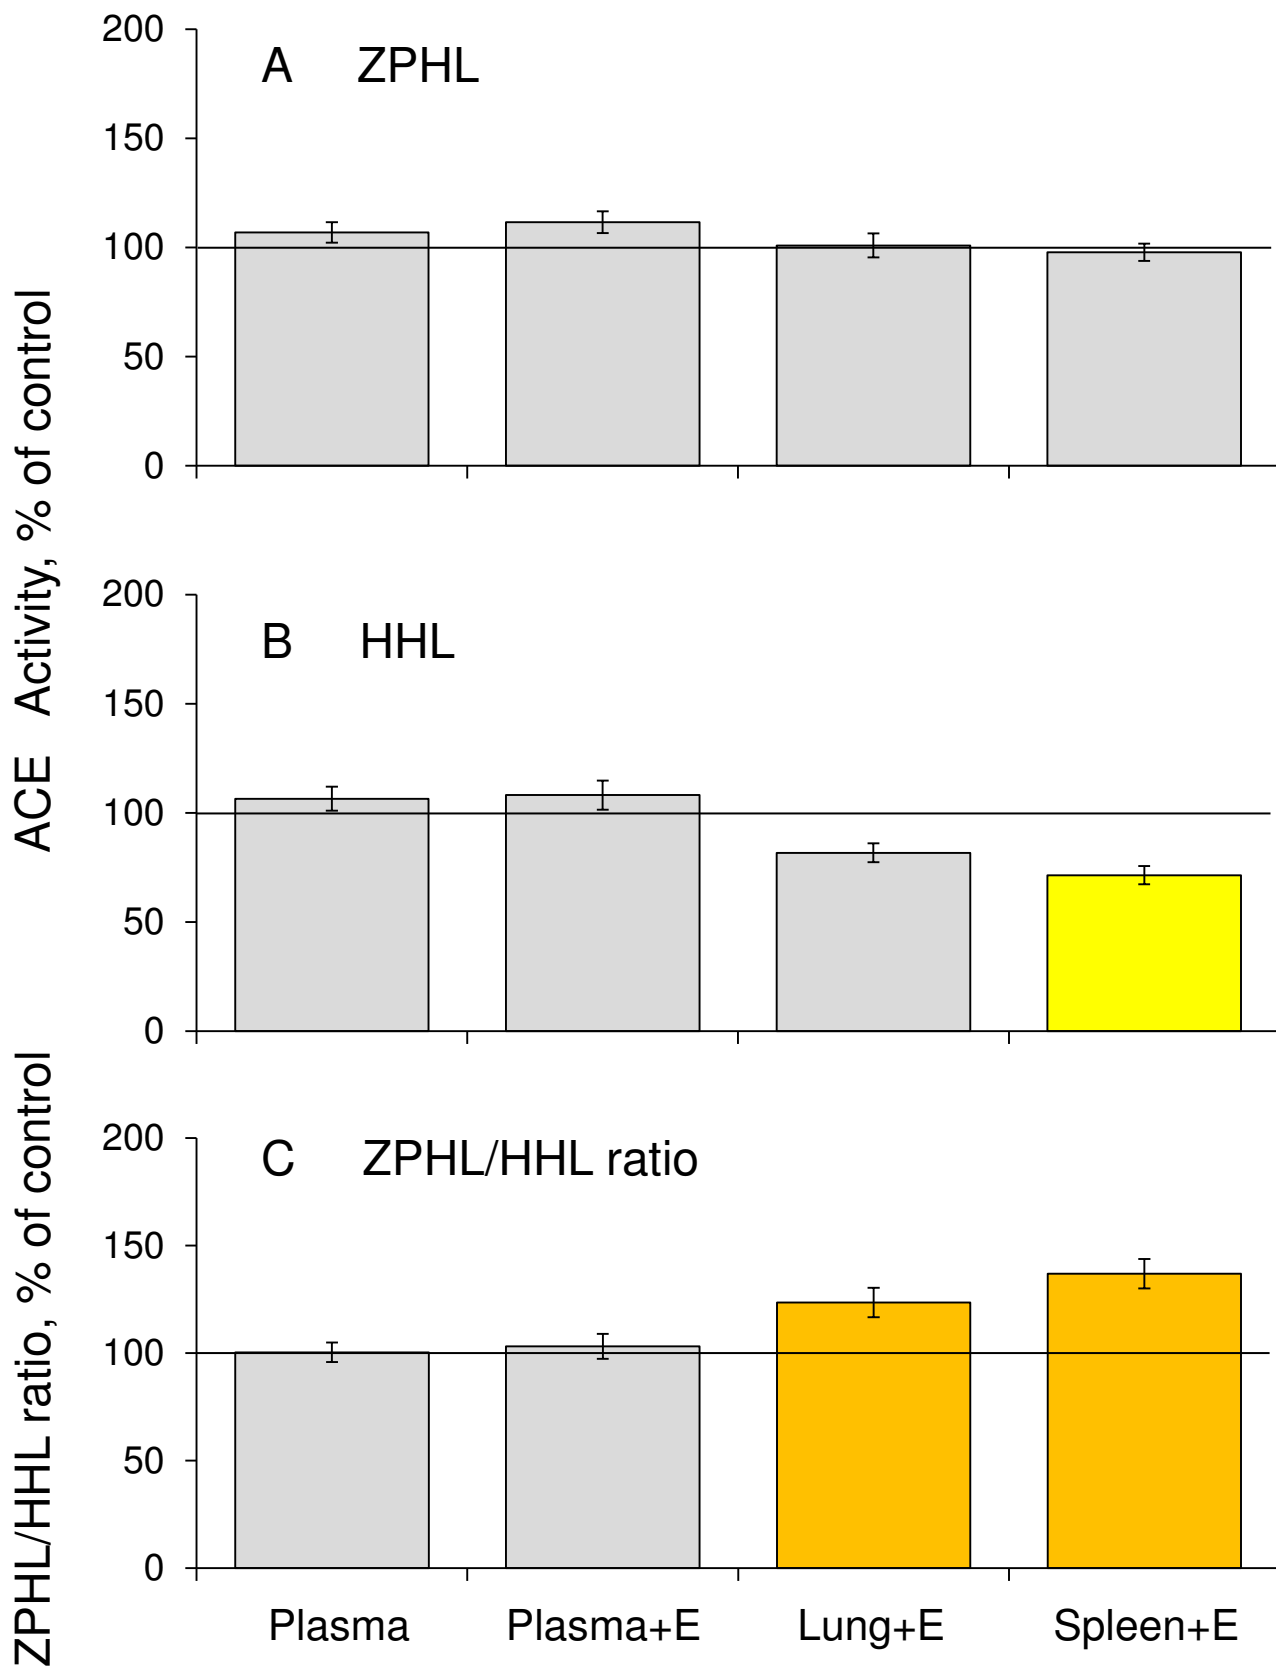

Fig. S5

Supplement: NIHMS947544-supplement.pdf [file NIHMS947544-supplement.pdf]
